# Supplementary material for: Genomewide Association Study of Acute Anterior Uveitis Identifies New Susceptibility Loci
Source: PubMed Central journal article supplement (PMC7415282; doi:10.1167/iovs.61.6.3), 2020-06-03
Supplement: iovs-61-6-3_s001.pdf [file iovs-61-6-3_s001.pdf]

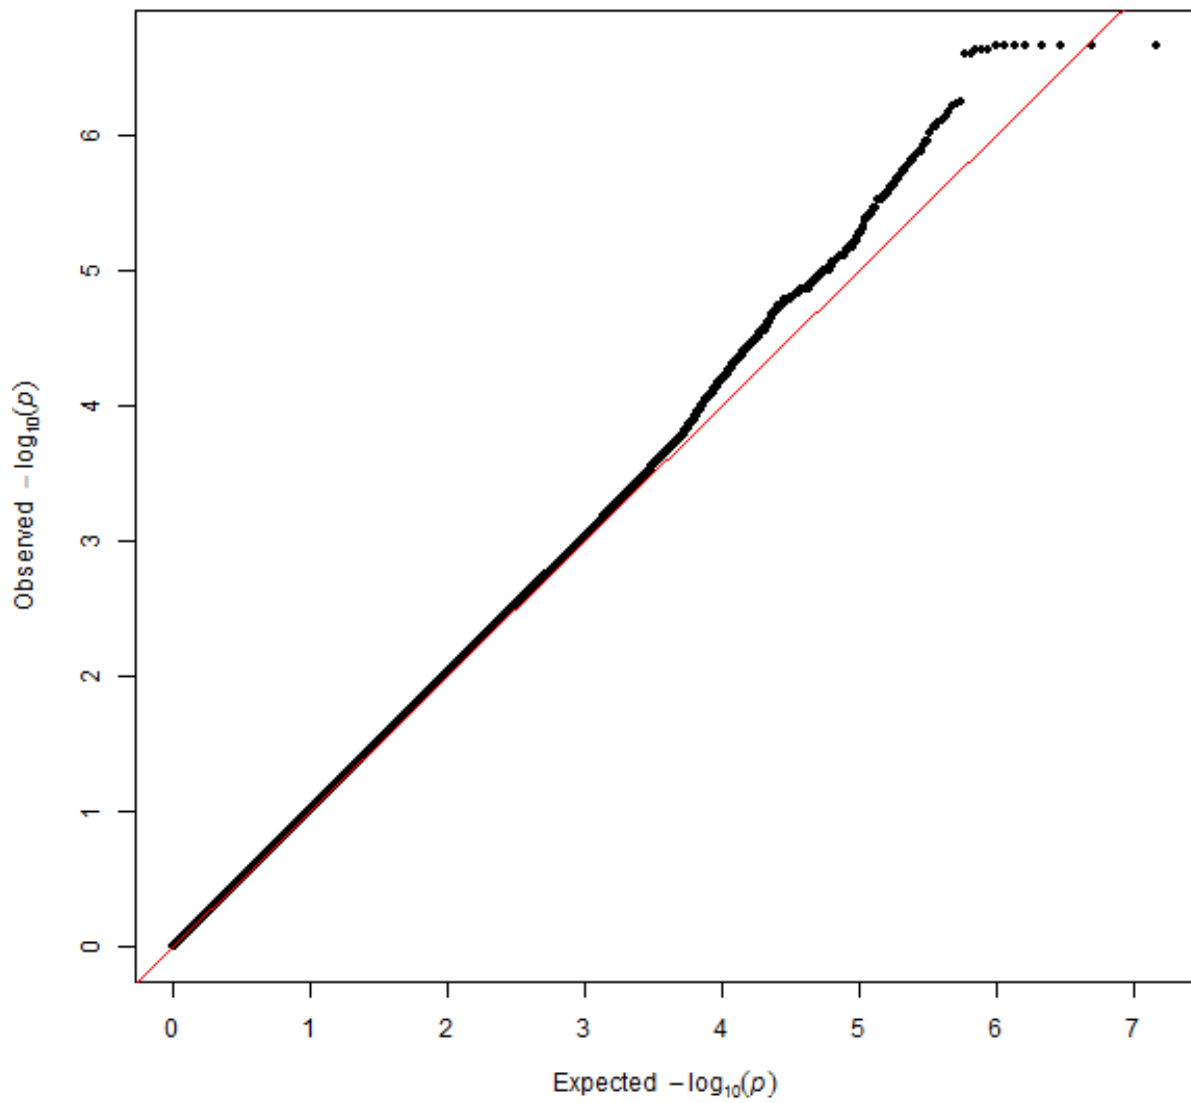

**Figure S1.** Quantile-quantile plot of association for the comparison of AS patients with AAU versus AS patients without AAU. MHC SNPs were excluded.
