# Supplementary material for: Genomewide Association Study of Acute Anterior Uveitis Identifies New Susceptibility Loci
Source: PubMed Central journal article supplement (PMC7415282; doi:10.1167/iovs.61.6.3), 2020-06-03
Supplement: iovs-61-6-3_s002.pdf [file iovs-61-6-3_s002.pdf]

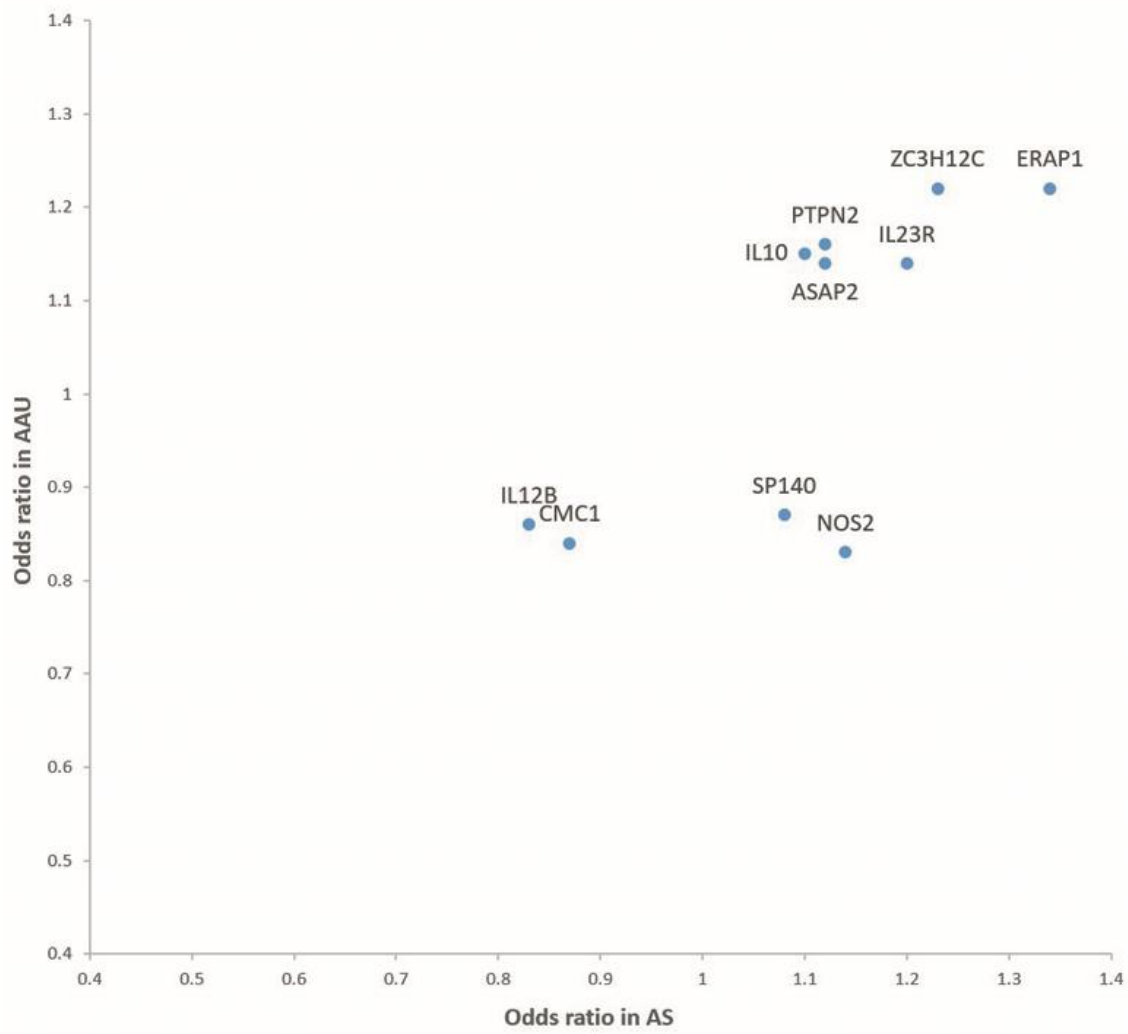

**Figure S2.** Comparison of odd ration of reported AS genes in AAU and AS.
