# Supplementary material for: Genomewide Association Study of Acute Anterior Uveitis Identifies New Susceptibility Loci
Source: PubMed Central journal article supplement (PMC7415282; doi:10.1167/iovs.61.6.3), 2020-06-03
Supplement: iovs-61-6-3_s003.pdf [file iovs-61-6-3_s003.pdf]

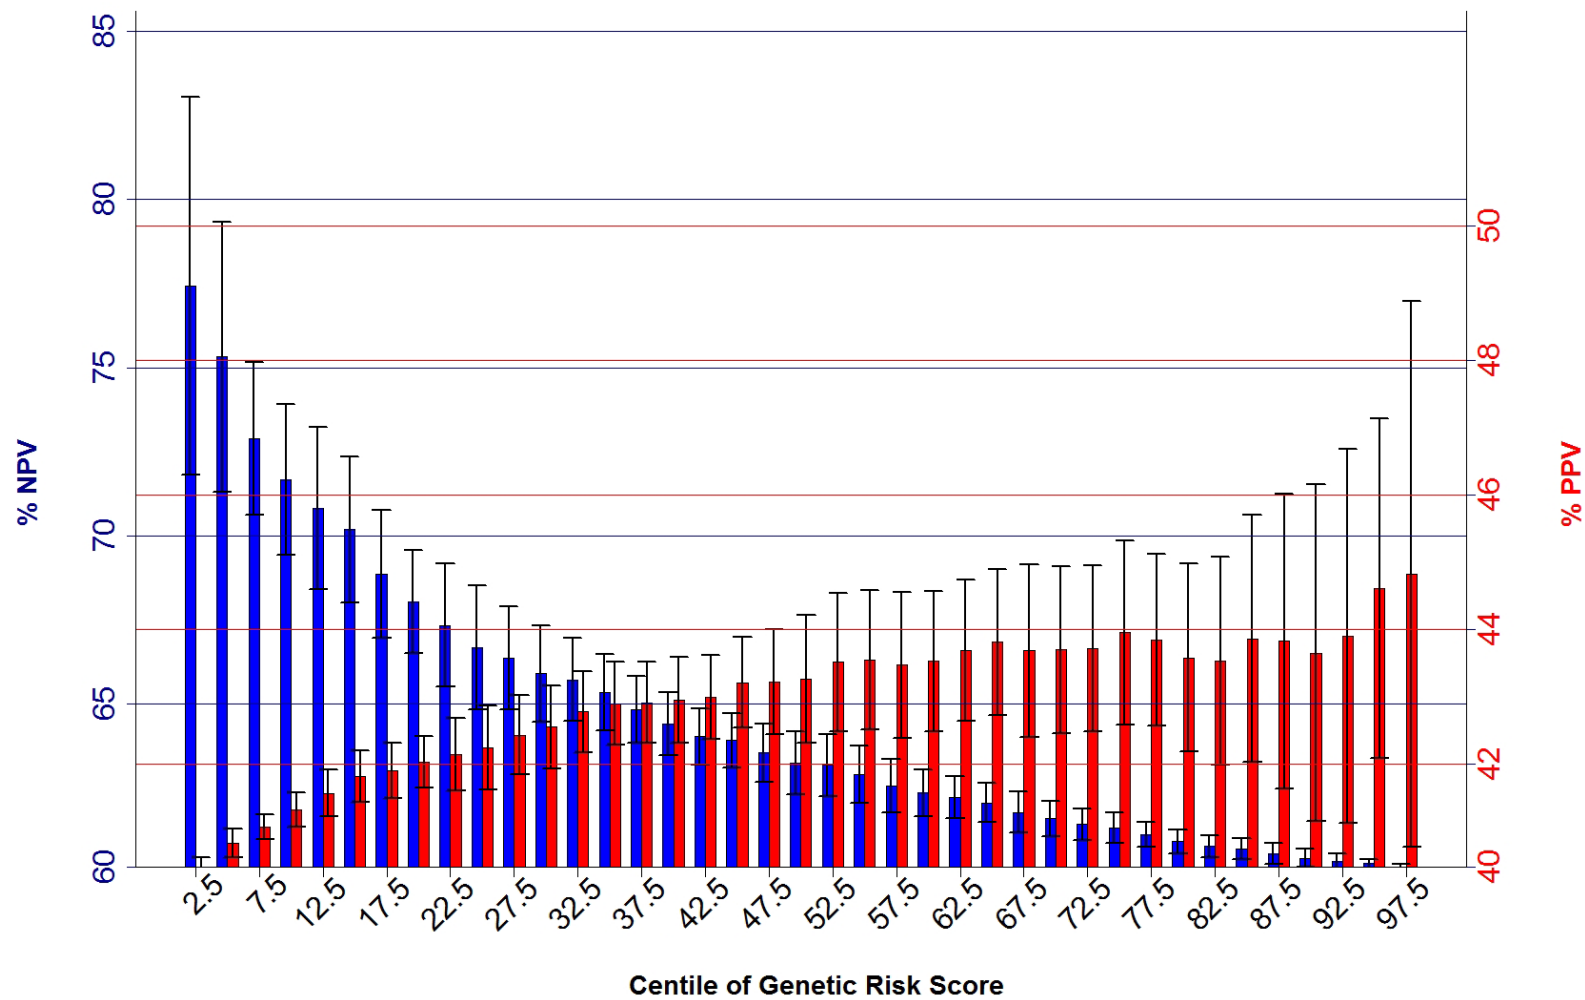

**Figure S3.** Positive and negative predictive values for AS+AAU+ versus AS+AAU- for centiles of genetic risk scores. The assumed prevalence of AS patients with AAU of 40% amongst the AS population. Error Bars denote 2 standard deviations based on 10-fold cross validation.
