# Supplementary material for: Genomewide Association Study of Acute Anterior Uveitis Identifies New Susceptibility Loci
Source: PubMed Central journal article supplement (PMC7415282; doi:10.1167/iovs.61.6.3), 2020-06-03
Supplement: iovs-61-6-3_s005.pdf [file iovs-61-6-3_s005.pdf]

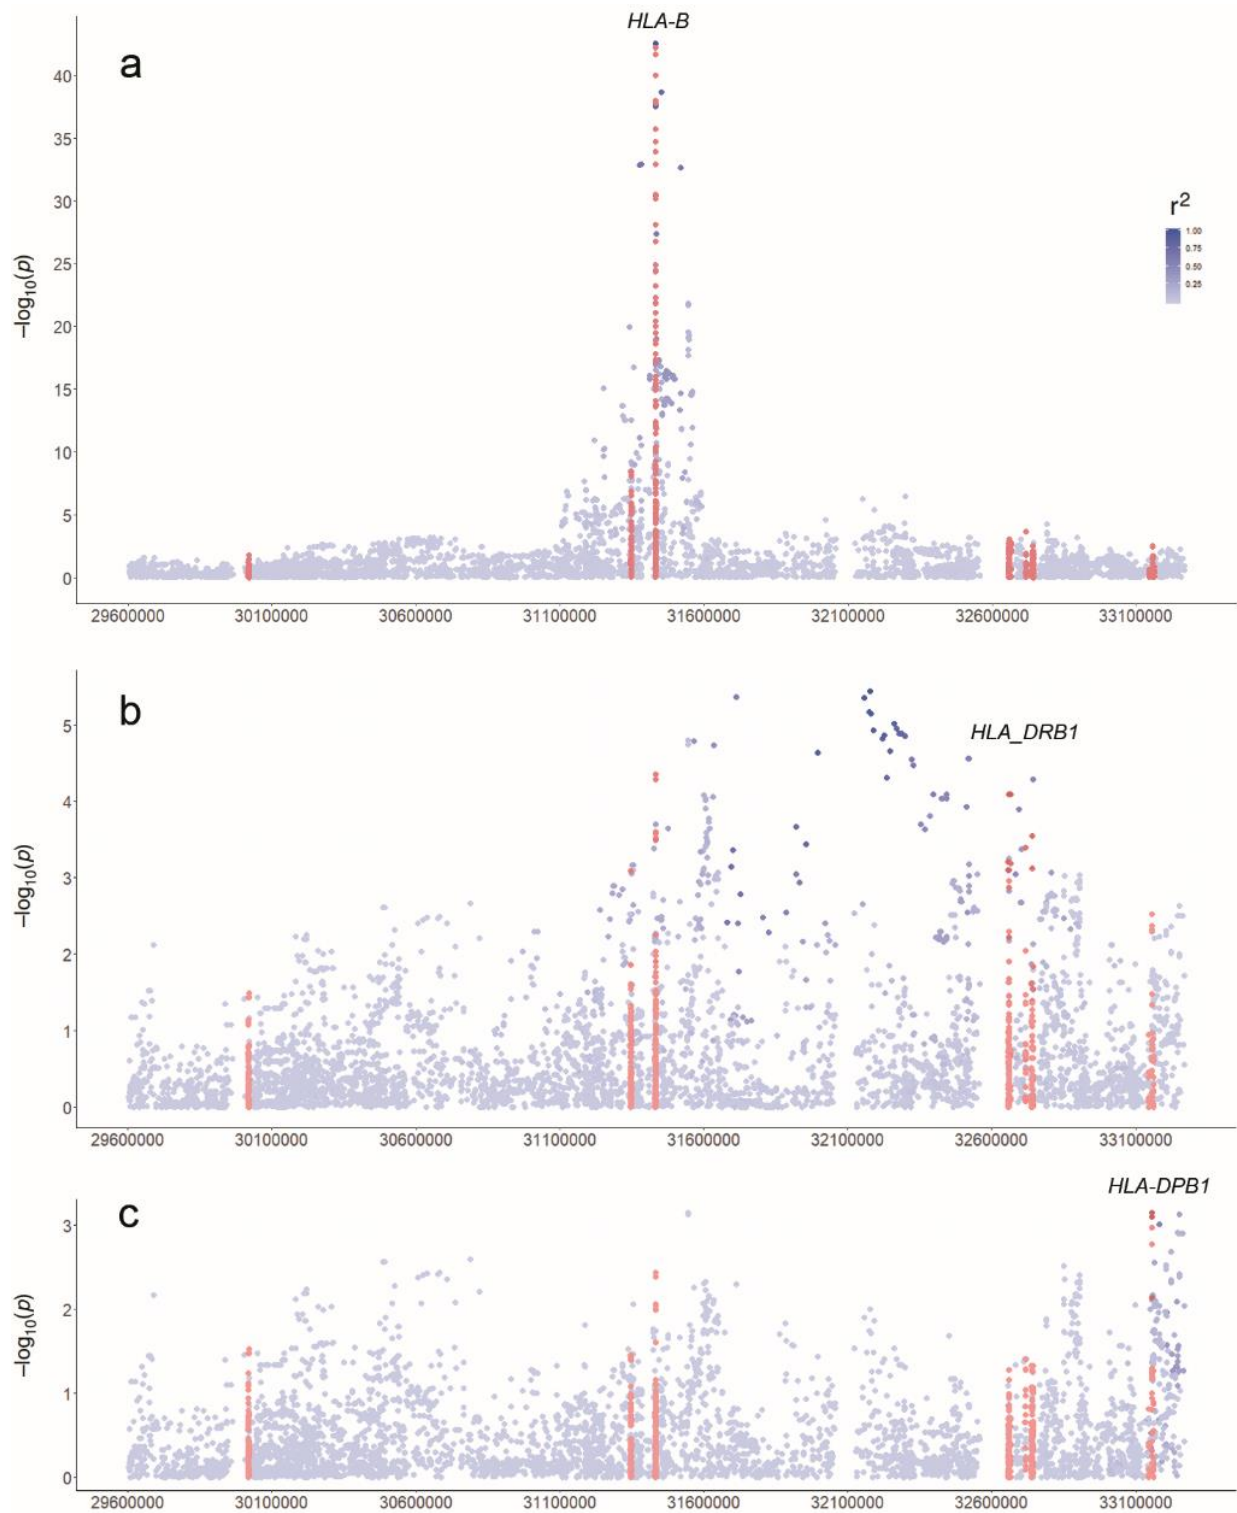

**Figure S5.** Manhattan plot of the conditional testing across the MHC. (a) The strongest association was found with SNPs and amino-acid position in the *HLA-B* locus. (b) Controlling for the effect of *HLA-B*

susceptibility alleles, an independent association was observed with SNPs and amino-acid position in the *HLA-DRB1* locus. (c) Controlling for the effect of both *HLA-B* and *HLA-DRB1* susceptibility alleles, an independent association was observed with SNPs and amino-acid position in the *HLA-DPB1* locus. SNP association tests are shown in blue circles, colour coded by linkage disequilibrium from the SNP with the strongest association. Amino-acid position tests are shown as red circles.
