# Supplementary material for: Genomewide Association Study of Acute Anterior Uveitis Identifies New Susceptibility Loci
Source: PubMed Central journal article supplement (PMC7415282; doi:10.1167/iovs.61.6.3), 2020-06-03
Supplement: iovs-61-6-3_s006.pdf [file iovs-61-6-3_s006.pdf]

**Table S1** AS cases and healthy controls involved in this study.

| Type         | Cohort                                                                                                  | Number |
|--------------|---------------------------------------------------------------------------------------------------------|--------|
| AS           | United Kingdom                                                                                          | 5,522  |
| AS           | Australo-Anglo-American Spondyloarthritis Consortium (TASC)                                             | 703    |
| AS           | Groupe Française d'Etude Génétique des Spondylarthrites (GFEGS)                                         | 191    |
| AS           | Australian                                                                                              | 172    |
| <i>Total</i> |                                                                                                         | 6,588  |
| Controls     | Understanding Society – The UK Household Longitudinal Study <sup>1</sup>                                | 9,469  |
| Controls     | Queensland Institute of Medical Research Berghofer Medical Research Institute Twins Cohort <sup>2</sup> | 2,664  |
| Controls     | Advancing Exercise & Sports Science Collaborative Research Network <sup>3</sup>                         | 1,706  |
| Controls     | Australian general population <sup>4</sup>                                                              | 621    |
| Controls     | Oregon Metagenomics Controls <sup>5</sup>                                                               | 82     |
| <i>Total</i> |                                                                                                         | 14,542 |

1. <https://www.understandingsociety.ac.uk/>
2. <https://www.qimrberghofer.edu.au/qtwin/>
3. Australian recreational joggers not screened for any medical condition.
4. 'Aussie Normals' cohort (Koerbin et al, *Pathology*. 49(5):518-525, 2017.)
5. Asquith et al, *Arthritis Rheumatol*. Epub Apr 3, 2019.

**Table S2** Summary of quality control.

---

| <b>Thresholds</b>                                                                           |                    |
|---------------------------------------------------------------------------------------------|--------------------|
| Genotyping missingness rate                                                                 | 0.05               |
| Individual missingness rate                                                                 | 0.05               |
| Hardy-Weinberg Equilibrium                                                                  | $1 \times 10^{-6}$ |
| Minor allele frequency                                                                      | 0.01               |
| Heterozygosity versus missingness outliers beyond 3 standard deviations (SD) were excluded. |                    |
| Identity by descent                                                                         | 0.185              |
| <b>After QC</b>                                                                             |                    |
| Individuals                                                                                 | 6588               |
| SNPs                                                                                        | 7,436,415          |

---

**Table S3** Genomic inflation factor stratified by frequency, imputation quality score and MHC.

| <b>Region</b> | <b><math>\lambda</math></b> | <b><math>\lambda_{1000}</math></b> | <b>SNP set</b>     |
|---------------|-----------------------------|------------------------------------|--------------------|
| With MHC      | 1.0108                      | 1.0034                             | Info 0.6 + MAF >1% |
| Non-MHC       | 1.0079                      | 1.0024                             | Info 0.6 + MAF >1% |
| With MHC      | 1.0150                      | 1.0047                             | Info 0.6 + MAF >5% |
| Non-MHC       | 1.0131                      | 1.0041                             | Info 0.6 + MAF >5% |
| With MHC      | 1.0080                      | 1.0024                             | Info 0.8 + MAF >1% |
| Non-MHC       | 1.0065                      | 1.0020                             | Info 0.8 + MAF >1% |
| With MHC      | 1.0150                      | 1.0047                             | Info 0.8 + MAF >5% |
| Non-MHC       | 1.0131                      | 1.0041                             | Info 0.8 + MAF >5% |

$\lambda$ , genomic inflation factor; Info, imputation quality score; MAF, minor allele frequency.

**Table S4** Results of the associations between the causal genes of AS and AAU.

| Reported AS genes | SNP ID     | Chr. | Position* | <i>P</i>              | Effect allele | OR   | 95% CI    | Tag SNP in AS#<br>(OR <sub>AS</sub> /OR <sub>AAU</sub> ) | D'/R <sup>2</sup> | Direction in AS |
|-------------------|------------|------|-----------|-----------------------|---------------|------|-----------|----------------------------------------------------------|-------------------|-----------------|
| <i>IL23R</i>      | rs11209032 | 1    | 67740092  | $2.55 \times 10^{-4}$ | A             | 1.14 | 1.06-1.23 | rs11209032<br>(1.20/1.14)                                | 1/1               | Concordant      |
| <i>ASAP2</i>      | rs56111045 | 2    | 9406008   | $7.98 \times 10^{-4}$ | G             | 1.14 | 1.06-1.23 | rs2666218<br>(1.12/1.13)                                 | 1/0.995           | Concordant      |
| <i>CMC1</i>       | rs10510609 | 3    | 28305301  | $4.10 \times 10^{-4}$ | A             | 0.84 | 0.76-0.93 | rs10510607<br>(0.87/0.85)                                | 0.965/0.913       | Concordant      |
| <i>IL12B</i>      | rs2853696  | 5    | 158744660 | $8.91 \times 10^{-4}$ | T             | 0.86 | 0.78-0.94 | rs6556416<br>(0.83/0.89)                                 | 0.778/0.277       | Concordant      |
| <i>ZC3H12C</i>    | rs17645205 | 11   | 109981505 | $6.34 \times 10^{-4}$ | G             | 1.22 | 1.09-1.37 | rs7115956<br>(1.23/1.001)                                | 0.953/0.086       | Concordant      |
| <i>IL10</i>       | rs6703630  | 1    | 206948639 | $4.07 \times 10^{-4}$ | T             | 1.15 | 1.06-1.24 | rs3024493<br>(1.1/0.997)                                 | 0.846/0.043       | ND              |
| <i>SPI40</i>      | rs10498245 | 2    | 231111422 | $4.07 \times 10^{-4}$ | G             | 0.87 | 0.81-0.94 | rs12694846<br>(1.08/0.927)                               | 0.556/0.231       | ND              |
| <i>PTPN2</i>      | rs8084448  | 18   | 12888220  | $2.91 \times 10^{-4}$ | T             | 1.16 | 1.07-1.26 | rs12968719<br>(1.12/1.11)                                | 0.307/0.03        | ND              |

Chr., chromosome; OR, odds ratio; 95% CI, 95% confidence interval; ND, not determined.

\* UCSC human genome build 19.

# The list of loci associated with AS was from the recent published review of AS genetics.<sup>24</sup>

**Table S5** Association signals and amino acid positions in HLA proteins.

| <b>Chr.</b> | <b>Amino acid position</b> | <b>OR</b> | <b>L95</b> | <b>U95</b> | <b>P-value</b>         |
|-------------|----------------------------|-----------|------------|------------|------------------------|
| 6           | AA_B_97_31432180_N         | 2.35      | 2.08       | 2.66       | $6.09 \times 10^{-43}$ |
| 6           | AA_B_70_31432506_K         | 2.35      | 2.07       | 2.65       | $2.20 \times 10^{-42}$ |
| 6           | AA_B_114_31432129_DN       | 2.27      | 2.01       | 2.56       | $9.84 \times 10^{-41}$ |
| 6           | AA_B_114_31432129_H        | 2.27      | 2.01       | 2.56       | $9.84 \times 10^{-41}$ |
| 6           | AA_B_114_31432129_HK       | 2.27      | 2.01       | 2.56       | $9.84 \times 10^{-41}$ |
| 6           | AA_B_114_31432129_Hx       | 2.27      | 2.01       | 2.56       | $9.84 \times 10^{-41}$ |
| 6           | AA_B_77_31432485_D         | 2.16      | 1.92       | 2.42       | $1.10 \times 10^{-38}$ |
| 6           | AA_B_77_31432485_SN        | 2.15      | 1.92       | 2.42       | $1.60 \times 10^{-38}$ |
| 6           | AA_B_97_31432180_NV        | 2.09      | 1.86       | 2.35       | $1.96 \times 10^{-36}$ |
| 6           | AA_B_70_31432506_QK        | 0.54      | 0.49       | 0.60       | $1.89 \times 10^{-35}$ |
| 6           | AA_B_70_31432506_QN        | 2.03      | 1.82       | 2.28       | $1.18 \times 10^{-34}$ |
| 6           | AA_B_97_31432180_WN        | 1.96      | 1.76       | 2.19       | $1.16 \times 10^{-33}$ |
| 6           | AA_B_69_31432509_A         | 0.57      | 0.52       | 0.63       | $3.29 \times 10^{-31}$ |
| 6           | AA_B_69_31432509_T         | 0.58      | 0.52       | 0.63       | $6.33 \times 10^{-31}$ |
| 6           | AA_B_70_31432506_N         | 0.58      | 0.52       | 0.63       | $6.33 \times 10^{-31}$ |
| 6           | AA_B_71_31432503           | 0.58      | 0.52       | 0.63       | $6.33 \times 10^{-31}$ |
| 6           | AA_B_97_31432180_SRT       | 1.81      | 1.63       | 2.01       | $8.04 \times 10^{-29}$ |
| 6           | AA_B_97_31432180_TN        | 1.73      | 1.57       | 1.92       | $1.65 \times 10^{-27}$ |
| 6           | AA_B_67_31432515_C         | 1.73      | 1.56       | 1.91       | $1.35 \times 10^{-25}$ |
| 6           | AA_B_67_31432515_YC        | 0.62      | 0.57       | 0.68       | $4.25 \times 10^{-25}$ |
| 6           | AA_B_97_31432180_SRW       | 0.60      | 0.55       | 0.66       | $5.96 \times 10^{-24}$ |
| 6           | AA_B_163_31431982_E        | 0.64      | 0.58       | 0.70       | $5.46 \times 10^{-23}$ |
| 6           | AA_B_163_31431982_Ex       | 0.64      | 0.58       | 0.70       | $5.46 \times 10^{-23}$ |
| 6           | AA_B_11_31432683           | 0.63      | 0.58       | 0.69       | $1.34 \times 10^{-22}$ |
| 6           | AA_B_97_31432180_SRV       | 0.62      | 0.56       | 0.68       | $1.56 \times 10^{-22}$ |
| 6           | AA_B_67_31432515_FS        | 0.65      | 0.59       | 0.71       | $7.71 \times 10^{-22}$ |
| 6           | AA_B_67_31432515_CM        | 1.60      | 1.45       | 1.77       | $3.69 \times 10^{-21}$ |
| 6           | AA_B_97_31432180_SN        | 0.66      | 0.60       | 0.72       | $1.01 \times 10^{-20}$ |
| 6           | AA_B_12_31432680           | 0.65      | 0.60       | 0.72       | $3.19 \times 10^{-20}$ |
| 6           | AA_B_97_31432180_SR        | 0.65      | 0.59       | 0.71       | $1.24 \times 10^{-19}$ |
| 6           | AA_B_116_31432123_D        | 0.65      | 0.60       | 0.72       | $2.30 \times 10^{-19}$ |
| 6           | AA_B_116_31432123_Dx       | 0.65      | 0.60       | 0.72       | $2.30 \times 10^{-19}$ |
| 6           | AA_B_97_31432180_SNV       | 0.67      | 0.62       | 0.73       | $1.45 \times 10^{-18}$ |

|   |                       |      |      |      |                        |
|---|-----------------------|------|------|------|------------------------|
| 6 | AA_B_9_31432689_H     | 0.67 | 0.61 | 0.73 | $4.90 \times 10^{-18}$ |
| 6 | AA_B_97_31432180_SWN  | 0.68 | 0.63 | 0.74 | $6.65 \times 10^{-18}$ |
| 6 | AA_B_74_31432494      | 0.70 | 0.64 | 0.76 | $9.47 \times 10^{-17}$ |
| 6 | AA_B_97_31432180_STN  | 0.69 | 0.64 | 0.76 | $1.76 \times 10^{-16}$ |
| 6 | AA_B_80_31432476_T    | 0.69 | 0.63 | 0.75 | $3.19 \times 10^{-16}$ |
| 6 | AA_B_116_31432123_DL  | 0.69 | 0.63 | 0.75 | $3.94 \times 10^{-16}$ |
| 6 | AA_B_116_31432123_YFS | 0.69 | 0.63 | 0.75 | $3.94 \times 10^{-16}$ |
| 6 | AA_B_97_31432180_RT   | 0.70 | 0.64 | 0.76 | $5.42 \times 10^{-16}$ |
| 6 | AA_B_45_31432581_E    | 0.71 | 0.65 | 0.77 | $1.25 \times 10^{-15}$ |
| 6 | AA_B_45_31432581_EG   | 0.71 | 0.65 | 0.77 | $1.25 \times 10^{-15}$ |
| 6 | AA_B_97_31432180_RW   | 0.71 | 0.65 | 0.77 | $8.30 \times 10^{-15}$ |
| 6 | AA_B_113_31432132_H   | 0.71 | 0.65 | 0.77 | $1.94 \times 10^{-14}$ |
| 6 | AA_B_113_31432132_Y   | 0.71 | 0.65 | 0.77 | $1.94 \times 10^{-14}$ |
| 6 | AA_B_97_31432180_RV   | 0.71 | 0.65 | 0.78 | $2.50 \times 10^{-14}$ |
| 6 | AA_B_116_31432123_FD  | 0.72 | 0.66 | 0.79 | $3.94 \times 10^{-13}$ |
| 6 | AA_B_116_31432123_YLS | 0.72 | 0.66 | 0.79 | $3.94 \times 10^{-13}$ |
| 6 | AA_B_97_31432180_R    | 0.73 | 0.67 | 0.79 | $8.19 \times 10^{-13}$ |
| 6 | AA_B_-16_31432889_L   | 0.73 | 0.66 | 0.79 | $1.32 \times 10^{-12}$ |
| 6 | AA_B_-16_31432889_V   | 0.73 | 0.66 | 0.79 | $1.32 \times 10^{-12}$ |
| 6 | AA_B_32_31432620      | 0.73 | 0.67 | 0.80 | $3.43 \times 10^{-12}$ |
| 6 | AA_B_116_31432123_YS  | 0.75 | 0.69 | 0.81 | $3.81 \times 10^{-11}$ |
| 6 | AA_B_116_31432123_YSx | 0.75 | 0.69 | 0.81 | $3.81 \times 10^{-11}$ |
| 6 | AA_B_77_31432485_SG   | 0.74 | 0.68 | 0.81 | $6.50 \times 10^{-11}$ |
| 6 | AA_B_67_31432515_SM   | 0.75 | 0.69 | 0.81 | $6.77 \times 10^{-11}$ |
| 6 | AA_B_77_31432485_S    | 0.74 | 0.68 | 0.81 | $7.44 \times 10^{-11}$ |
| 6 | AA_B_80_31432476_N    | 0.75 | 0.68 | 0.81 | $8.10 \times 10^{-11}$ |
| 6 | AA_B_82_31432470      | 0.75 | 0.68 | 0.81 | $8.10 \times 10^{-11}$ |
| 6 | AA_B_83_31432467      | 0.75 | 0.68 | 0.81 | $8.10 \times 10^{-11}$ |
| 6 | AA_B_24_31432644_T    | 0.75 | 0.69 | 0.82 | $9.62 \times 10^{-11}$ |
| 6 | AA_B_9_31432689_Y     | 0.76 | 0.70 | 0.83 | $5.23 \times 10^{-10}$ |
| 6 | AA_B_45_31432581_EM   | 0.76 | 0.70 | 0.83 | $1.26 \times 10^{-9}$  |
| 6 | AA_B_45_31432581_TK   | 0.76 | 0.70 | 0.83 | $1.26 \times 10^{-9}$  |
| 6 | AA_B_67_31432515_S    | 0.76 | 0.70 | 0.83 | $2.31 \times 10^{-9}$  |
| 6 | AA_C_16_31347579      | 1.32 | 1.20 | 1.45 | $3.37 \times 10^{-9}$  |
| 6 | AA_C_211_31346157_T   | 1.32 | 1.20 | 1.45 | $3.37 \times 10^{-9}$  |

|   |                       |      |      |      |                       |
|---|-----------------------|------|------|------|-----------------------|
| 6 | AA_B_114_31432129_DH  | 0.77 | 0.70 | 0.84 | $4.13 \times 10^{-9}$ |
| 6 | AA_B_114_31432129_N   | 0.77 | 0.70 | 0.84 | $4.13 \times 10^{-9}$ |
| 6 | AA_B_114_31432129_NK  | 0.77 | 0.70 | 0.84 | $4.13 \times 10^{-9}$ |
| 6 | AA_B_114_31432129_Nx  | 0.77 | 0.70 | 0.84 | $4.13 \times 10^{-9}$ |
| 6 | AA_B_45_31432581_ET   | 0.76 | 0.70 | 0.83 | $4.66 \times 10^{-9}$ |
| 6 | AA_B_45_31432581_KM   | 0.76 | 0.70 | 0.83 | $4.66 \times 10^{-9}$ |
| 6 | AA_B_163_31431982_ET  | 0.76 | 0.70 | 0.84 | $4.92 \times 10^{-9}$ |
| 6 | AA_B_163_31431982_L   | 0.76 | 0.70 | 0.84 | $4.92 \times 10^{-9}$ |
| 6 | AA_B_116_31432123_YD  | 0.76 | 0.69 | 0.83 | $5.30 \times 10^{-9}$ |
| 6 | AA_B_116_31432123_YDx | 0.76 | 0.69 | 0.83 | $5.30 \times 10^{-9}$ |
| 6 | AA_C_163_31346888_E   | 1.31 | 1.19 | 1.44 | $6.26 \times 10^{-9}$ |
| 6 | AA_C_211_31346157_A   | 1.31 | 1.19 | 1.44 | $9.10 \times 10^{-9}$ |
| 6 | AA_B_116_31432123_FS  | 0.75 | 0.68 | 0.83 | $1.82 \times 10^{-8}$ |
| 6 | AA_B_116_31432123_YDL | 0.75 | 0.68 | 0.83 | $1.82 \times 10^{-8}$ |
| 6 | AA_B_156_31432003_DW  | 0.76 | 0.69 | 0.84 | $2.37 \times 10^{-8}$ |
| 6 | AA_B_156_31432003_RL  | 0.76 | 0.69 | 0.84 | $2.37 \times 10^{-8}$ |
| 6 | AA_B_325_31430282_C   | 0.77 | 0.70 | 0.84 | $3.20 \times 10^{-8}$ |
| 6 | AA_B_325_31430282_S   | 0.77 | 0.70 | 0.84 | $4.28 \times 10^{-8}$ |

Chr., chromosome; OR, odds ratio; L95, Lower bound of 95% confidence interval for odds ratio; U95, Upper bound of 95% confidence interval for odds ratio.

**Table S6** Association signals and amino acid positions in HLA proteins after adjusting for the top signal.

| <b>Chr.</b> | <b>Amino acid</b>     | <b>OR</b> | <b>L95</b> | <b>U95</b> | <b>P</b>              |
|-------------|-----------------------|-----------|------------|------------|-----------------------|
| 6           | AA_B_67_31432515_Y    | 1.31      | 1.15       | 1.49       | $3.80 \times 10^{-5}$ |
| 6           | AA_B_70_31432506_Q    | 1.30      | 1.15       | 1.49       | $4.42 \times 10^{-5}$ |
| 6           | AA_B_70_31432506_QK   | 0.76      | 0.67       | 0.87       | $4.80 \times 10^{-5}$ |
| 6           | AA_DRB1_71_32659935_A | 1.27      | 1.13       | 1.44       | $8.51 \times 10^{-5}$ |
| 6           | AA_DRB1_-1_32665412_S | 1.27      | 1.13       | 1.44       | $8.51 \times 10^{-5}$ |

Chr., chromosome; OR, odds ratio; L95, Lower bound of 95% confidence interval for odds ratio; U95, Upper bound of 95% confidence interval for odds ratio.
